# Supplementary material
Source: PubMed Central journal article supplement (PMC3091177)
Supplement: supp_M110.206482_supplemental.pdf [file supp_M110.206482_supplemental.pdf]

SUPPLEMENTAL MATERIAL

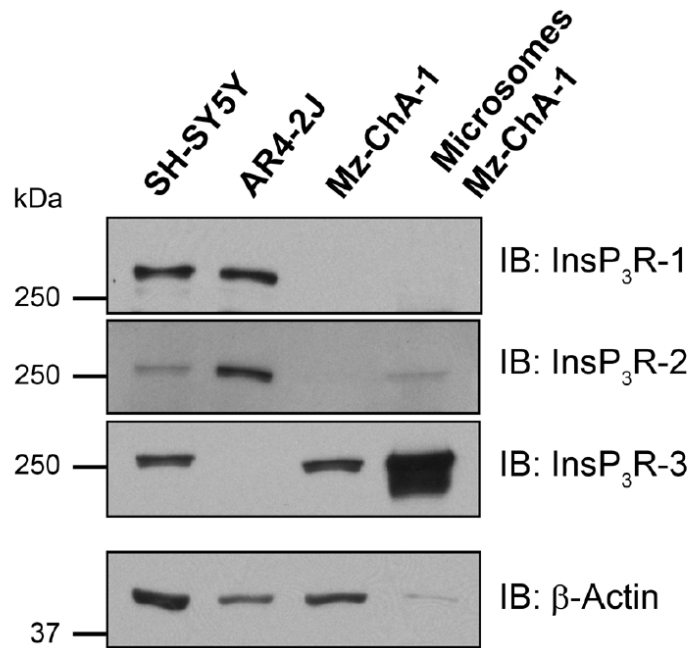

**Supplemental Figure S1.** InsP<sub>3</sub>R-subtype expression in different cell lines. Western blot analysis of whole cell lysates of SH-SY5Y, AR4-2J and Mz-ChA-1 cells and Mz-ChA-1 microsomal preparation. Membranes were probed with anti-InsP<sub>3</sub>R-1, anti-InsP<sub>3</sub>R-2, anti-InsP<sub>3</sub>R-3 and anti-β-actin antibody respectively. Representative blots are shown. Order of probing did not change results.

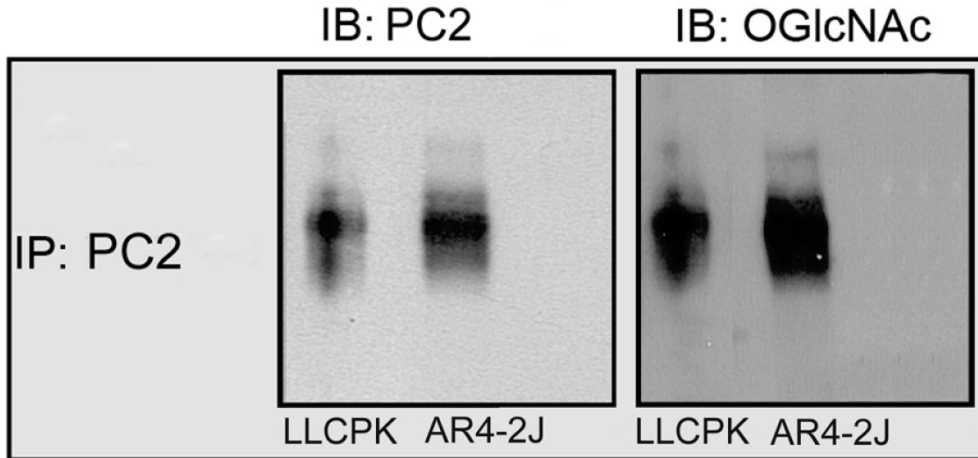

Supplemental Figure S2. PC2 is modified by O-GlcNAcylation. Western blot analysis of endogenous PC2 immunoprecipitated from LLCPK (left lane) and AR4-2J (right lane) cell lysates using anti-PC2 antibody (left panel) or anti-O-GlcNAc antibody (RL2; right panel). Lanes were removed from a larger gel for presentation. The PC2 antibody was kindly provided by Prof. S. Somlo, Yale University, New Haven, CT. LLCPK cells were cultured M199 media (Invitrogen) supplemented with 3% fetal calf serum (FCS).

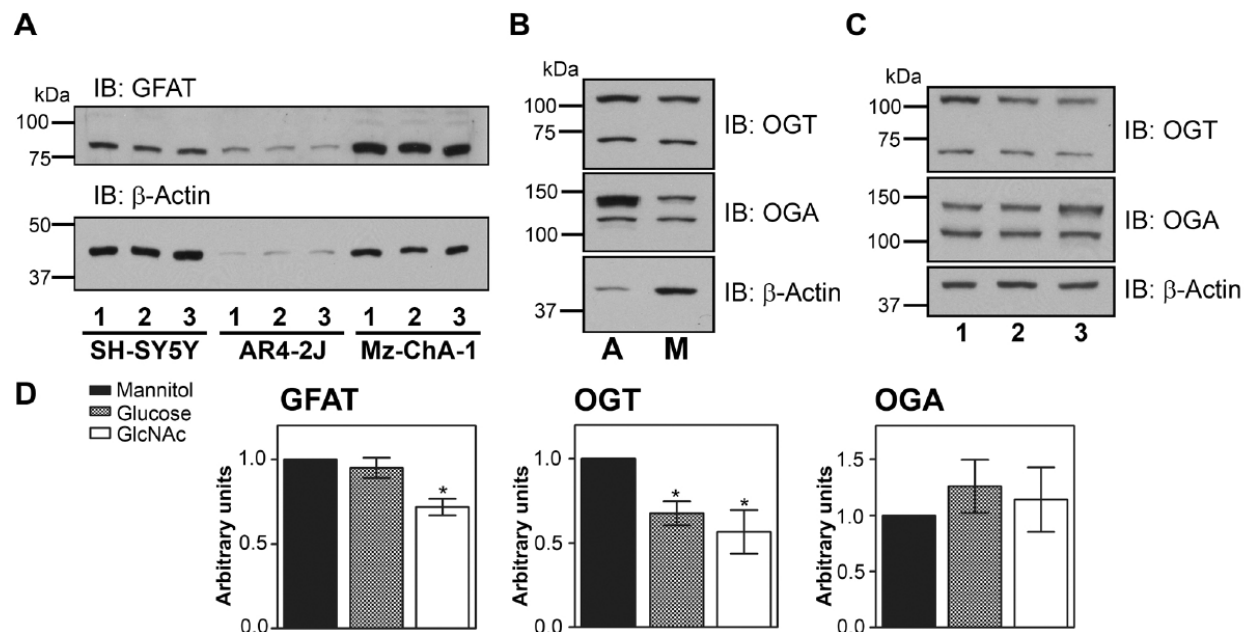

**Supplemental Figure S3.** Enzymes involved in O-GlcNAc glycosylation are regulated. Western blot analysis of the level of OGT (two subunits at approximately 110 kDa and respectively 78 kDa (68)), OGA (at approximately 130 kDa, a second band may be nonspecific binding or a caspase cleavage product of the enzyme (69)) or GFAT (at approximately 77 kDa (70)) in each of the cell types used for this study. **A.** SH-SY5Y, AR4-2J and Mz-ChA-1 cells were grown for 72 hours in (1) 20 mM mannitol, (2) 20 mM glucose, (3) 8 mM GlcNAc. Equal protein amounts (25  $\mu$ g) were analyzed through gel electrophoresis and western blot analysis was performed. Membranes were probed for GFAT and  $\beta$ -actin. **B.** Analysis of enzyme levels of whole cell lysate of AR4-2J (A) and Mz-ChA-1 (M) cells. 25  $\mu$ g of protein were analyzed and membranes were probed with anti-OGT, anti-O-GlcNAcase or anti- $\beta$ -actin antibody respectively. **C.** Mz-ChA-1 cells were grown for 72 hours in (1) 20 mM mannitol, (2) 20 mM glucose, (3) 8 mM GlcNAc and equal protein amounts (25  $\mu$ g) were analyzed through gel electrophoresis and western blot analysis was performed. Membranes were probed for OGT, O-GlcNAcase and  $\beta$ -actin respectively. **D.** Analysis of GFAT, OGT and OGA protein expression levels in Mz-ChA-1 lysate grown in different media. Representative blots are shown in panel A and panel C. Protein levels are shown as arbitrary units of densitometry values of GFAT, OGT and OGA bands in relation to corresponding densitometry data of  $\beta$ -actin bands. Ratios were normalized internally per blot to mannitol data and results were averaged, n=4 for each enzyme and condition. \* represents  $p < 0.05$

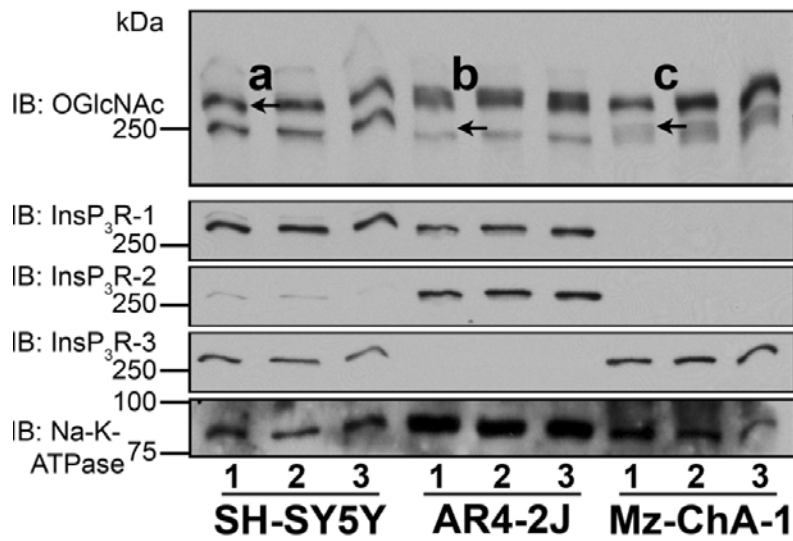

**Supplemental Figure S4.** O-GlcNAc glycosylation of different InsP<sub>3</sub>R subtypes. Western blot analysis of whole cell lysates of SH-SY5Y, AR4-2J and Mz-ChA-1 cells. Cells were grown for 72 hours in (1) 20 mM mannitol, (2) 20 mM glucose and (3) 8 mM GlcNAc. Samples were lysed, and analyzed through western blot analysis. Membranes were probed for O-GlcNAc, InsP<sub>3</sub>R-1, InsP<sub>3</sub>R-2, InsP<sub>3</sub>R-3 and Na-K-ATPase as a loading control. Arrows on the O-GlcNAc blot are showing the apparent molecular mass of a) InsP<sub>3</sub>R-1, b) InsP<sub>3</sub>R-2 and c) InsP<sub>3</sub>R-3. For InsP<sub>3</sub>R-1 and InsP<sub>3</sub>R-3 a corresponding band could be detected with RL2 whereas no band could be detected for InsP<sub>3</sub>R-2.
